# Supplementary material for: Changes in the Expression Profile of Pyroptosis-Related Genes in Senescent Retinal Pigment Epithelial Cells after Lutein Treatment
Source: MDPI journal article supplement (doi:10.3390/cimb45020097), 2023-02-09
Supplement: s1 [file s1]

## Supplementary materials

**Table S1.** Pyroptosis-related genes selected for oligonucleotide microarrays analysis.

| Gene symbol    |                |                 |                 |                 |                  |
|----------------|----------------|-----------------|-----------------|-----------------|------------------|
| <i>ABL1</i>    | <i>CASP6</i>   | <i>EZH2</i>     | <i>IRF2</i>     | <i>PANX1</i>    | <i>SUZ12</i>     |
| <i>ACE2</i>    | <i>CASP8</i>   | <i>FADD</i>     | <i>IRF3</i>     | <i>PARP1</i>    | <i>TFAM</i>      |
| <i>ADORA1</i>  | <i>CASP9</i>   | <i>FGF21</i>    | <i>JUN</i>      | <i>PDCD6IP</i>  | <i>TFAP2A</i>    |
| <i>ADORA2A</i> | <i>CD14</i>    | <i>FMR1</i>     | <i>KCNQ1OT1</i> | <i>PECAM1</i>   | <i>TLR2</i>      |
| <i>ADORA2B</i> | <i>CDC37</i>   | <i>FNDC4</i>    | <i>KIF23</i>    | <i>PGF</i>      | <i>TLR3</i>      |
| <i>ADORA3</i>  | <i>CDK9</i>    | <i>FOXO3</i>    | <i>KLF3-AS1</i> | <i>PKM</i>      | <i>TLR8</i>      |
| <i>AGER</i>    | <i>CEBPB</i>   | <i>FOXP3</i>    | <i>LRPPRC</i>   | <i>PKN2</i>     | <i>TNF</i>       |
| <i>AIM2</i>    | <i>CEP55</i>   | <i>FPR2</i>     | <i>LY96</i>     | <i>PLCG1</i>    | <i>TNFRSF13B</i> |
| <i>ALK</i>     | <i>CHI3L1</i>  | <i>GBP1</i>     | <i>LYST</i>     | <i>POLA1</i>    | <i>TP53</i>      |
| <i>ANXA1</i>   | <i>CHMP1A</i>  | <i>GJA1</i>     | <i>MALT1</i>    | <i>POLA2</i>    | <i>TP63</i>      |
| <i>ANXA2</i>   | <i>CHMP2A</i>  | <i>GLMN</i>     | <i>MAP3K7</i>   | <i>POP1</i>     | <i>TRAF6</i>     |
| <i>APAF1</i>   | <i>CHMP2B</i>  | <i>GPB1</i>     | <i>MAPK14</i>   | <i>PPARG</i>    | <i>TREM1</i>     |
| <i>APIP</i>    | <i>CHMP3</i>   | <i>GPX4</i>     | <i>MDM2</i>     | <i>PRDM1</i>    | <i>TREM2</i>     |
| <i>APOE</i>    | <i>CHMP4A</i>  | <i>GSDMB</i>    | <i>MEFV</i>     | <i>PRF1</i>     | <i>TRIM21</i>    |
| <i>APOL1</i>   | <i>CHMP6</i>   | <i>GSDMD</i>    | <i>MEG3</i>     | <i>PRIM1</i>    | <i>TRIM24</i>    |
| <i>ASIC1</i>   | <i>CHMP7</i>   | <i>GSK3B</i>    | <i>MELK</i>     | <i>PRIM2</i>    | <i>TRIM31</i>    |
| <i>ATF6</i>    | <i>CLEC5A</i>  | <i>GZMA</i>     | <i>METTL3</i>   | <i>PRKACA</i>   | <i>TRPM2</i>     |
| <i>ATG3</i>    | <i>CPTP</i>    | <i>GZMB</i>     | <i>MKI67</i>    | <i>PRMT5</i>    | <i>TUBB6</i>     |
| <i>ATG7</i>    | <i>CRTAC1</i>  | <i>HDAC6</i>    | <i>MMP1</i>     | <i>PRTN3</i>    | <i>TXNIP</i>     |
| <i>BAK1</i>    | <i>CSNK1A1</i> | <i>HMGB1</i>    | <i>MST1</i>     | <i>PTEN</i>     | <i>UBE2D2</i>    |
| <i>BAX</i>     | <i>CTSG</i>    | <i>HSP90AA1</i> | <i>MYD88</i>    | <i>PTGS2</i>    | <i>UBE2D3</i>    |
| <i>BCL2</i>    | <i>CTSV</i>    | <i>HSP90AB1</i> | <i>NAIP</i>     | <i>PTPN11</i>   | <i>UBR2</i>      |
| <i>BECN1</i>   | <i>CXCL8</i>   | <i>HTRA1</i>    | <i>NEAT1</i>    | <i>PYCARD</i>   | <i>UCP1</i>      |
| <i>BHLHE40</i> | <i>CYCS</i>    | <i>HUWE1</i>    | <i>NEDD4</i>    | <i>RAB5A</i>    | <i>USF2</i>      |
| <i>BHLHE41</i> | <i>DDX3X</i>   | <i>ICAM1</i>    | <i>NFE2L2</i>   | <i>RBBP4</i>    | <i>USP24</i>     |
| <i>BIRC2</i>   | <i>DHX9</i>    | <i>IFI16</i>    | <i>NFKB1</i>    | <i>RBBP7</i>    | <i>USP47</i>     |
| <i>BIRC3</i>   | <i>DNMT1</i>   | <i>IFIH1</i>    | <i>NFS1</i>     | <i>RIPK1</i>    | <i>USP8</i>      |
| <i>BNIP3</i>   | <i>DNMT3A</i>  | <i>IKZF1</i>    | <i>NINJ1</i>    | <i>SCAF11</i>   | <i>UTS2</i>      |
| <i>BRCC3</i>   | <i>DNMT3B</i>  | <i>IL13</i>     | <i>NLRP1</i>    | <i>SDHB</i>     | <i>VCAM1</i>     |
| <i>BRD4</i>    | <i>DPEP1</i>   | <i>IL13RA2</i>  | <i>NLRP2</i>    | <i>SEC22B</i>   | <i>VDR</i>       |
| <i>BSG</i>     | <i>DPP8</i>    | <i>IL18</i>     | <i>NLRP3</i>    | <i>SERPINB1</i> | <i>VIM</i>       |
| <i>BST2</i>    | <i>DRD2</i>    | <i>IL18BP</i>   | <i>NLRX1</i>    | <i>SEZ6L2</i>   | <i>VPS28</i>     |
| <i>BTK</i>     | <i>DUOX1</i>   | <i>IL1A</i>     | <i>NOD1</i>     | <i>SIRT1</i>    | <i>VPS4B</i>     |
| <i>CAMP</i>    | <i>E2F4</i>    | <i>IL1B</i>     | <i>NOD2</i>     | <i>SLC16A4</i>  | <i>VTN</i>       |
| <i>CAPN1</i>   | <i>EED</i>     | <i>IL1RN</i>    | <i>NOS1</i>     | <i>SNIP1</i>    | <i>XIST</i>      |
| <i>CARD8</i>   | <i>EGFR</i>    | <i>IL32</i>     | <i>NOS2</i>     | <i>SQSTM1</i>   | <i>YWHAE</i>     |
| <i>CASP1</i>   | <i>ELANE</i>   | <i>IL36G</i>    | <i>NR1H2</i>    | <i>STAT3</i>    | <i>YWHAZ</i>     |
| <i>CASP3</i>   | <i>ELAVL1</i>  | <i>IL6</i>      | <i>OSM</i>      | <i>STK4</i>     | <i>ZBP1</i>      |
| <i>CASP4</i>   | <i>EPHA2</i>   | <i>IRAK3</i>    | <i>P2RX7</i>    | <i>STXBP2</i>   | <i>ZNF532</i>    |
| <i>CASP5</i>   | <i>ERP44</i>   | <i>IRF1</i>     | <i>PAK2</i>     | <i>STXBP3</i>   |                  |

**Table S2.** The classification of selected pyroptosis-related genes with a description of their function based on the STRING database.

| Gene         | Function                                                                                                                                                                                    | RT-qPCR results |             |              |
|--------------|---------------------------------------------------------------------------------------------------------------------------------------------------------------------------------------------|-----------------|-------------|--------------|
|              |                                                                                                                                                                                             | [H] vs. [C]     | [L] vs. [C] | [LH] vs. [C] |
|              | Role in the formation of the NLRP3 inflammasome;                                                                                                                                            |                 |             |              |
| <b>TXNIP</b> | may act as an oxidative stress mediator by inhibiting thioredoxin activity or by limiting its bioavailability                                                                               | ↓*              | ↓*          | ↓*           |
| <b>CXCL8</b> | It is released from several cell types in response to an inflammatory stimulus; involved in neutrophil activation                                                                           | ↑*              | ↑*          | ↑            |
| <b>BCL2</b>  | Regulates cell death by controlling the mitochondrial membrane permeability; may attenuate inflammation by impairing NLRP1-inflammasome activation, hence CASP1 activation and IL1B release | Ns              | Ns          | Ns           |
| <b>BAX</b>   | Can induce either apoptosis or pyroptosis during stress factors and depending on caspases; Can induce pyroptosis via BAK/BAX-caspase 3-GSDME pathway                                        | Ns              | ↓*          | Ns           |
| <b>CASP1</b> | Main function is to cleave GSDMD; activated by inflammasome                                                                                                                                 | ↑               | Ns          | Ns           |
| <b>CASP9</b> | Cysteine-aspartate protease involved in apoptosis; indirectly associated with CASP3/GSDME pathway which can result in pyroptosis in cells                                                   | Ns              | Ns          | Ns           |

[C]—control; [L]—lutein-treated ARPE-19 cells; [H]—H<sub>2</sub>O<sub>2</sub>-treated ARPE-19 cells; [LH]—lutein- and H<sub>2</sub>O<sub>2</sub>-treated ARPE-19 cells; ↑, ↓—higher and lower gene expression; \*—statistical significance ( $p < 0.05$ ), Tukey's post hoc test; Ns—not statistically significant; RT-qPCR—reverse transcription quantitative real-time polymerase chain reaction; TXNIP—thioredoxin-interacting protein; CXCL8—C-X-C motif chemokine ligand 8; BCL2—B-cell lymphoma; BAX—BCL2-associated X protein; CASP1—caspase-1; CASP9—caspase-9; NLRP3—NOD-, LRR- and pyrin domain-containing protein 3; NLRP1—NOD-, LRR- and pyrin domain-containing protein 1; IL1B—interleukin 1 beta; BAK—BCL2 homologous antagonist killer; GSDME—gasdermin E; CASP3—caspase 3; GSDMD—gasdermin D; STRING database—Search Tool for the Retrieval of Interacting Genes / Proteins.
